# Supplementary material for: Novel anionic surfactant-modified chlorhexidine and its potent antimicrobial properties
Source: Royal Society of Chemistry journal article supplement (doi:10.1039/d3dt02559d), 2023-12-14
Supplement: d3dt02559d1.pdf [file d3dt02559d1.pdf]

Supporting Information

# Novel anionic surfactant-modified chlorhexidine and its potent antimicrobial properties

**Zilma Pereira Muneeswaran,<sup>a,c</sup> Baran Teoman,<sup>a,e</sup> Yu Wang,<sup>a,c</sup> Haroon Chaudhry,<sup>a,c</sup> Tatiana V. Brinzari,<sup>a</sup> Gaurav Verma,<sup>f</sup> Lomaani Ranasinghe,<sup>g</sup> Kylie Ryan Kaler,<sup>g</sup> Xiaoyi Huang,<sup>b</sup> Xing He,<sup>b</sup> Belvin Thomas,<sup>c</sup> Shiyu Xu,<sup>a</sup> Chi-Yuan Cheng,<sup>a</sup> Jeffrey M. Boyd,<sup>g</sup> Dailin Chen,<sup>b</sup> Zhigang Hao,<sup>a</sup> Shengqian Ma,<sup>f</sup> Tewodros Asefa,<sup>c,d</sup> Long Pan,<sup>a,\*</sup> and Viktor Dubovoy<sup>a,\*</sup>**

<sup>a</sup> Colgate-Palmolive Company, 909 River Road, Piscataway, New Jersey 08854, United States

<sup>b</sup> Colgate-Palmolive Company, 338 Qingnian Road, Economic Development Zone, Guangzhou 510620, China

<sup>c</sup> Department of Chemistry and Chemical Biology, Rutgers, The State University of New Jersey, 610 Taylor Road, Piscataway, New Jersey 08854, United States

<sup>d</sup> Department of Chemical and Biochemical Engineering, Rutgers, The State University of New Jersey, 98 Brett Road, Piscataway, New Jersey 08854, United States

<sup>e</sup> Otto H. York Department of Chemical and Materials Engineering, New Jersey Institute of Technology, 323 Dr. Martin Luther King Jr Boulevard, Newark, New Jersey 07102, United States

<sup>f</sup> Department of Chemistry, University of North Texas, 1508 W. Mulberry Street, Denton, Texas 76201, United States

<sup>g</sup> Department of Biochemistry and Microbiology, Rutgers, The State University of New Jersey, 76 Lipman Drive, New Brunswick, New Jersey 08901, United States

## 1. Structural Characterization via $^1\text{H}$ NMR

The representative  $^1\text{H}$  NMR spectrum is shown in Figure S1. The multiple peaks at 1.4 ppm and 1.55 ppm with the integration of 4.08 and 3.97 are corresponding to H-3, 4 and H-2, 5 proton signals of CHX. The triplet peaks at 3.4 ppm represent H-1 and H-6 with two proton signals each. Two doublet peaks at 6.9 ppm and 7.2 ppm represent the benzene ring protons with the two protons closer to chlorine having a lower chemical shield. Additionally, the dodecyl chain proton signal (- $\text{CH}_2$ -) in the  $^1\text{H}$  NMR was detected at 3.35 ppm and the methyl group of SDS was identified at 3.20 ppm. The result indicates that both dodecyl sulfate and CHX were present in the crystal. To further understand the association between CHX and dodecyl sulfate, the conventional NOESY experiment was performed (Figure S2). The spectrum clearly shows that the methyl group of dodecyl sulfate (3.35ppm) interacts with H-3,4 and H-2,5 of CHX (1.4ppm and 1.55ppm), as evidenced by a cross peak shown in Figure S2. This finding suggests that CHX and dodecyl sulfate are in proximity with each other in crystal structure.

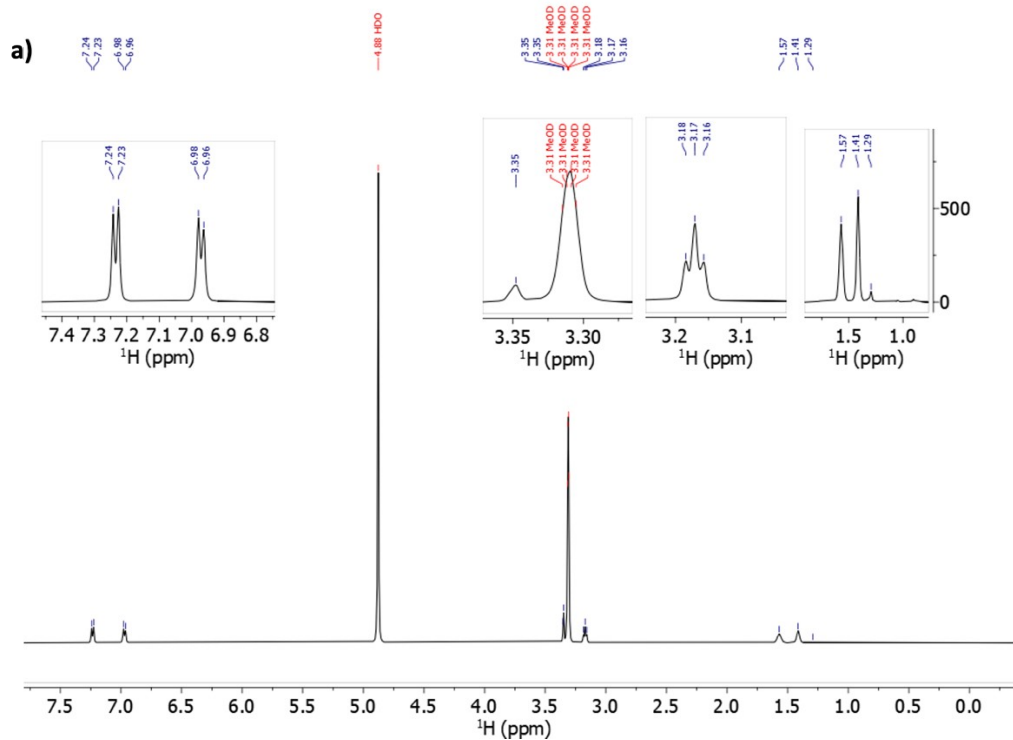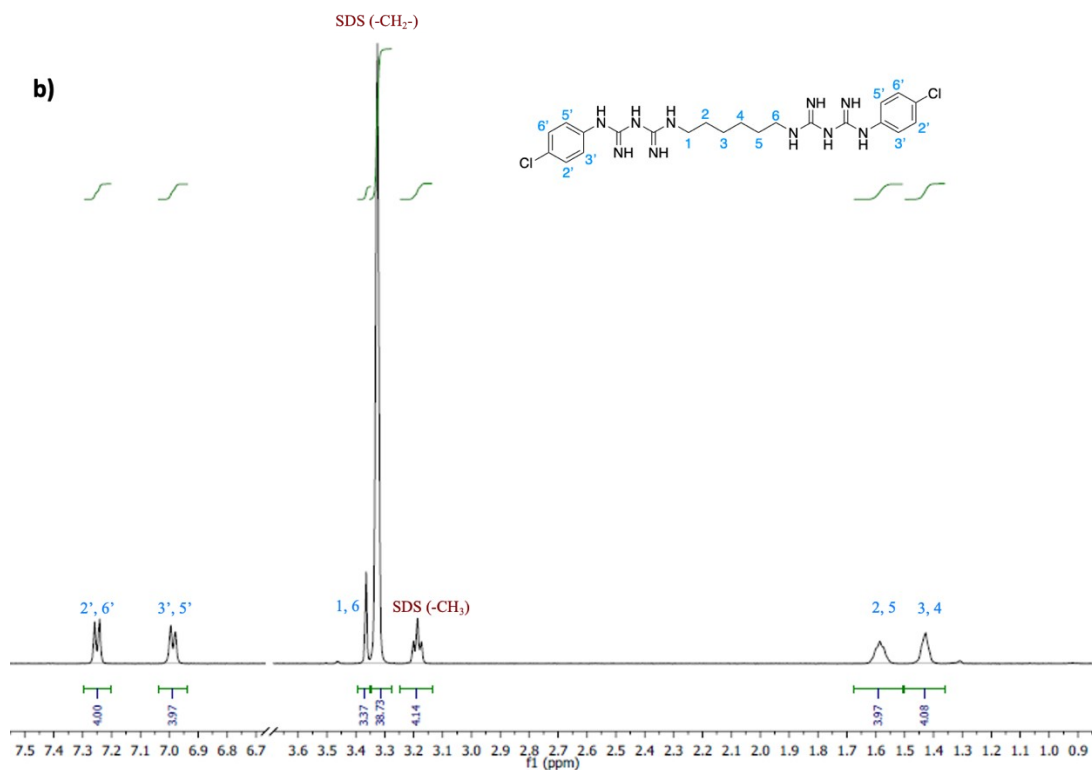

**Figure S1.**  $^1\text{H}$  NMR spectrum of full spectrum CHX-DS crystal. (a) full  $^1\text{H}$  NMR spectrum; (b)  $^1\text{H}$  NMR spectrum close-up with assigned peaks.

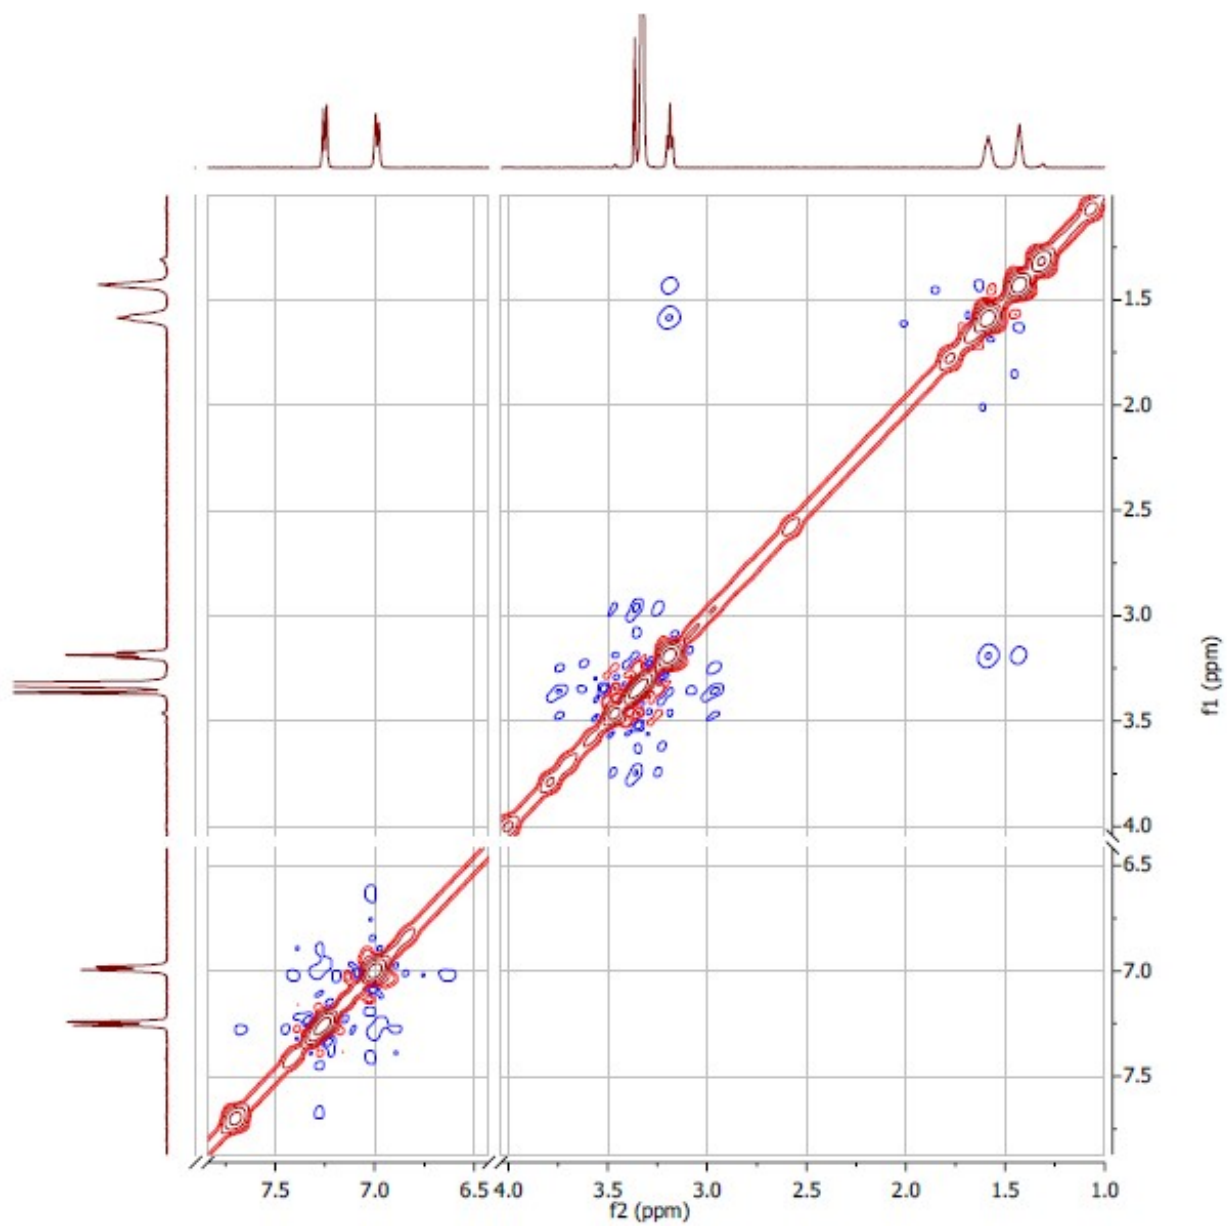

**Figure S2.** <sup>1</sup>H NMR (NOESY) spectrum of CHX-DS crystal.

## 2. Mass Spectroscopy Method and Results

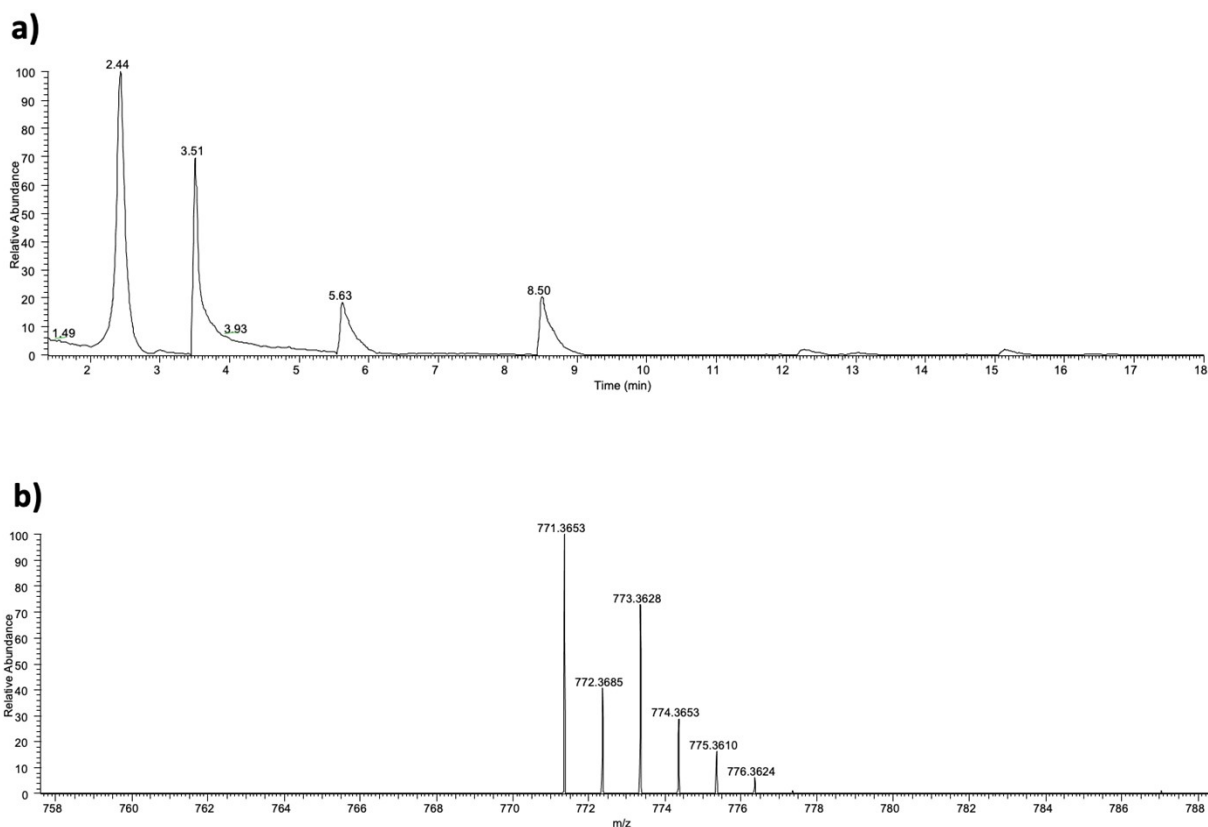

**Figure S3.** Liquid chromatography mass spectroscopy (LCMS) analysis of CHX-DS. a) Liquid chromatography separation of CHX-DS; b) Mass spectroscopy of CHX-DS.

The mass of 771 - 776 Daltons was identified which corresponds to one CHX coupled with one dodecyl sulfate molecule in positive mode of MS.

### 3. Crystal structure data

Crystal data and structure refinement, bond lengths, and bond angles for chlorhexidine dodecyl sulfate (CHX-DS) are presented in Tables S1-S3, respectively.

**Table S1.** Crystal data and structure refinement for CHX-DS.

|                                                |                                                              |
|------------------------------------------------|--------------------------------------------------------------|
| Identification code                            | CHX SDS                                                      |
| Empirical formula                              | $C_{46}H_{82}Cl_2N_{10}O_8S_2$                               |
| Formula weight                                 | 1038.23                                                      |
| Temperature/K                                  | 99.99                                                        |
| Crystal system                                 | triclinic                                                    |
| Space group                                    | P-1                                                          |
| a/Å                                            | 11.6393(3)                                                   |
| b/Å                                            | 13.6352(3)                                                   |
| c/Å                                            | 18.8400(5)                                                   |
| $\alpha/^\circ$                                | 70.2440(10)                                                  |
| $\beta/^\circ$                                 | 78.3980(10)                                                  |
| $\gamma/^\circ$                                | 89.769(2)                                                    |
| Volume/Å <sup>3</sup>                          | 2749.86(12)                                                  |
| Z                                              | 2                                                            |
| $\rho_{calc}/\text{g}/\text{cm}^3$             | 1.254                                                        |
| $\mu/\text{mm}^{-1}$                           | 2.238                                                        |
| F(000)                                         | 1116.0                                                       |
| Radiation                                      | CuK $\alpha$ ( $\lambda = 1.54178$ )                         |
| 2 $\Theta$ range for data collection/ $^\circ$ | 5.1 to 149.476                                               |
| Index ranges                                   | $-13 \leq h \leq 14, -17 \leq k \leq 16, -23 \leq l \leq 23$ |
| Reflections collected                          | 34528                                                        |
| Independent reflections                        | 10985 [ $R_{int} = 0.1176, R_{sigma} = 0.1162$ ]             |
| Data/restraints/parameters                     | 10985/558/726                                                |
| Goodness-of-fit on $F^2$                       | 1.134                                                        |
| Final R indexes [ $I \geq 2\sigma(I)$ ]        | $R_1 = 0.0744, wR_2 = 0.1722$                                |
| Final R indexes [all data]                     | $R_1 = 0.1038, wR_2 = 0.1815$                                |
| Largest diff. peak/hole / e Å <sup>-3</sup>    | 0.65/-0.42                                                   |
|                                                |                                                              |

**Table S2.** Bond Lengths for CHX-DS.

| <b>Atom</b> | <b>Atom</b> | <b>Length/Å</b> | <b>Atom</b> | <b>Atom</b> | <b>Length/Å</b> |
|-------------|-------------|-----------------|-------------|-------------|-----------------|
| S01         | O005        | 1.448(2)        | C011        | C012        | 1.381(6)        |
| S01         | O00A        | 1.457(2)        | C012        | C014        | 1.382(6)        |
| S01         | O00B        | 1.451(3)        | C013        | C017        | 1.396(5)        |
| S01         | O00C        | 1.572(2)        | C013        | C01C        | 1.391(5)        |
| S02         | O006        | 1.451(2)        | C0          | C12         | 1.517(13)       |
| S02         | O007        | 1.447(2)        | C017        | C019        | 1.386(6)        |
| S02         | O008        | 1.589(2)        | C018        | C019        | 1.384(6)        |
| S02         | O009        | 1.449(2)        | C018        | C01D        | 1.384(6)        |
| C103        | C012        | 1.746(4)        | C01A        | C01F        | 1.524(5)        |
| C104        | C018        | 1.744(4)        | C01B        | C01E        | 1.518(5)        |
| O008        | C010        | 1.450(4)        | C01B        | C01F        | 1.522(5)        |
| O00C        | C0          | 1.52(3)         | C01C        | C01D        | 1.387(6)        |
| O00C        | C11         | 1.452(15)       | C01E        | C01I        | 1.526(5)        |
| N00D        | C00N        | 1.340(4)        | C01G        | C01H        | 1.518(6)        |
| N00D        | C00Q        | 1.461(4)        | C01G        | C01J        | 1.513(5)        |
| N00E        | C00P        | 1.356(4)        | C01H        | C01L        | 1.520(6)        |
| N00E        | C00S        | 1.414(4)        | C01I        | C01K        | 1.529(6)        |
| N00F        | C00P        | 1.337(4)        | C01J        | C01K        | 1.526(6)        |
| N00G        | C00N        | 1.349(4)        | C1          | C4          | 1.539(13)       |
| N00H        | C00R        | 1.359(5)        | C1          | C14         | 1.503(12)       |
| N00I        | C00O        | 1.326(4)        | C2          | C3          | 1.534(9)        |
| N00I        | C00Z        | 1.454(4)        | C2          | C11         | 1.517(9)        |
| N00J        | C00O        | 1.338(4)        | C3          | C01T        | 1.518(9)        |
| N00K        | C00O        | 1.339(4)        | C4          | C6          | 1.529(13)       |

**Table S3.** Bond Angles for CHX-DS.

| Atom | Atom | Atom | Angle/°    | Atom | Atom | Atom | Angle/°   |
|------|------|------|------------|------|------|------|-----------|
| O005 | S01  | O00A | 112.94(14) | C011 | C012 | Cl03 | 119.0(3)  |
| O005 | S01  | O00B | 114.36(15) | C011 | C012 | C014 | 121.1(3)  |
| O005 | S01  | O00C | 102.24(13) | C014 | C012 | Cl03 | 119.8(3)  |
| O00A | S01  | O00C | 107.17(15) | C017 | C013 | N00M | 122.7(3)  |
| O00B | S01  | O00A | 112.03(14) | C01C | C013 | N00M | 117.7(3)  |
| O00B | S01  | O00C | 107.20(15) | C01C | C013 | C017 | 119.5(3)  |
| O006 | S02  | O008 | 106.69(13) | C012 | C014 | C00U | 119.5(3)  |
| O007 | S02  | O006 | 113.28(14) | C00V | C015 | C00W | 113.6(3)  |
| O007 | S02  | O008 | 102.16(13) | C12  | C0   | O00C | 112.2(19) |
| O007 | S02  | O009 | 114.40(15) | C019 | C017 | C013 | 119.7(4)  |
| O009 | S02  | O006 | 112.02(14) | C019 | C018 | Cl04 | 119.4(3)  |
| O009 | S02  | O008 | 107.32(13) | C019 | C018 | C01D | 121.0(4)  |
| C010 | O008 | S02  | 116.48(19) | C01D | C018 | Cl04 | 119.6(3)  |
| C0   | O00C | S01  | 122.8(11)  | C018 | C019 | C017 | 120.0(4)  |
| C11  | O00C | S01  | 113.4(5)   | C01F | C01A | C00Y | 112.2(3)  |
| C00N | N00D | C00Q | 123.1(3)   | C01E | C01B | C01F | 113.2(3)  |
| C00P | N00E | C00S | 127.4(3)   | C01D | C01C | C013 | 120.7(4)  |
| C00O | N00I | C00Z | 122.2(3)   | C018 | C01D | C01C | 119.0(4)  |
| C00R | N00K | C00O | 123.1(3)   | C01B | C01E | C01I | 113.5(3)  |
| C00P | N00L | C00N | 123.2(3)   | C01B | C01F | C01A | 114.1(3)  |
| C00R | N00M | C013 | 126.6(3)   | C01J | C01G | C01H | 114.5(4)  |
| N00D | C00N | N00G | 118.5(3)   | C01G | C01H | C01L | 114.0(4)  |
| N00D | C00N | N00L | 117.1(3)   | C01E | C01I | C01K | 114.0(3)  |



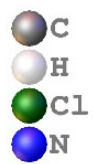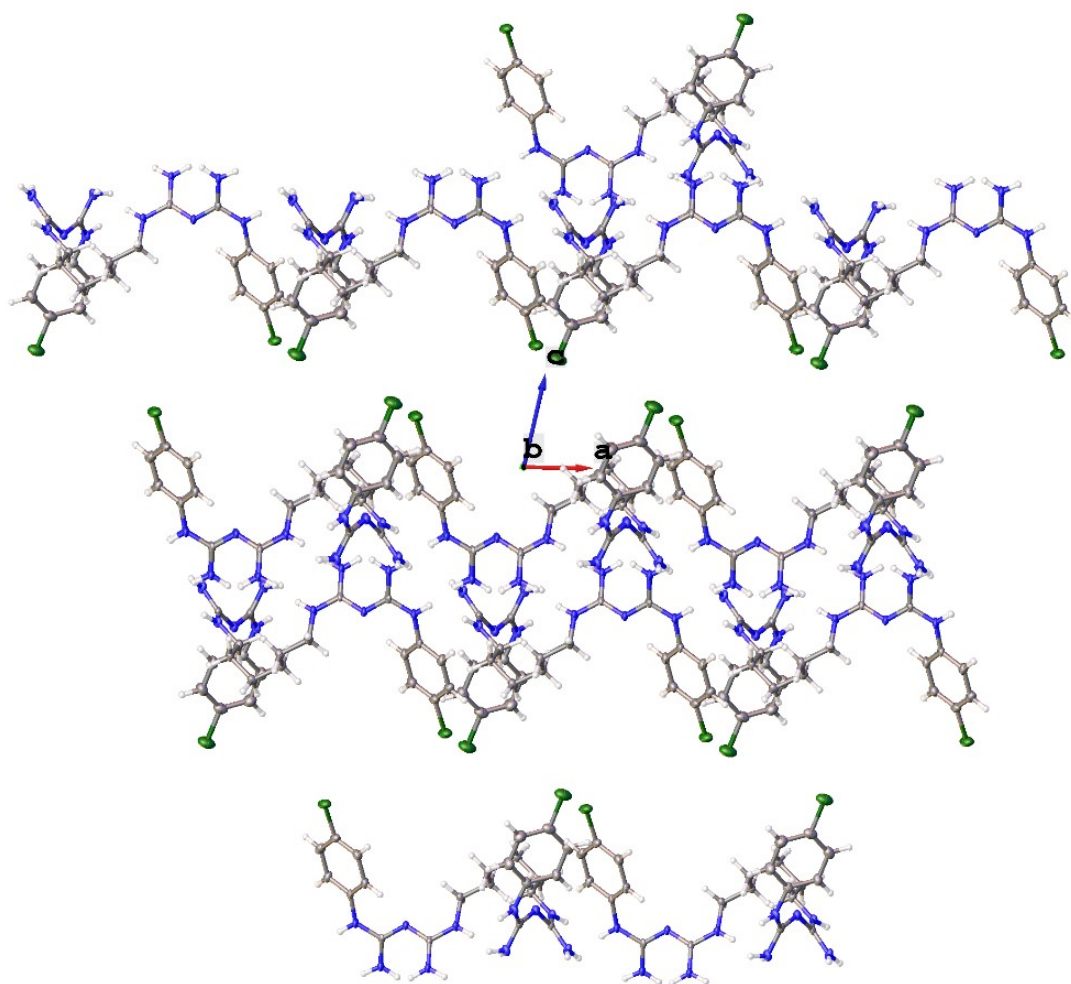

**Figure S4.** The alternating layers of the CHX coils.

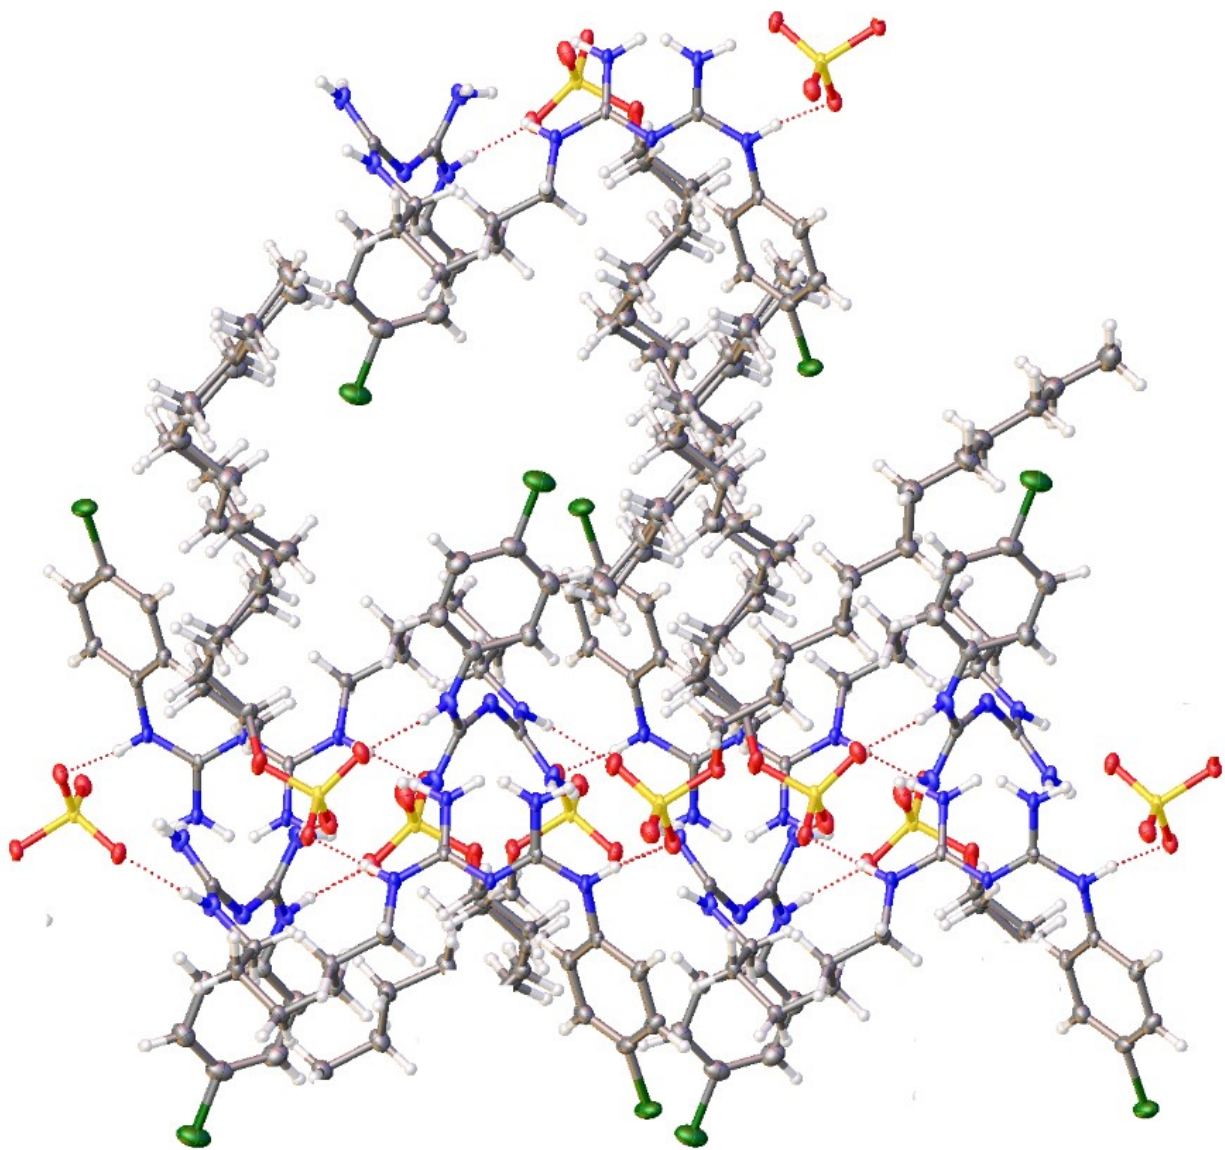

**Figure S5.** The network formed by H-bonding between the CHX and DS molecules.

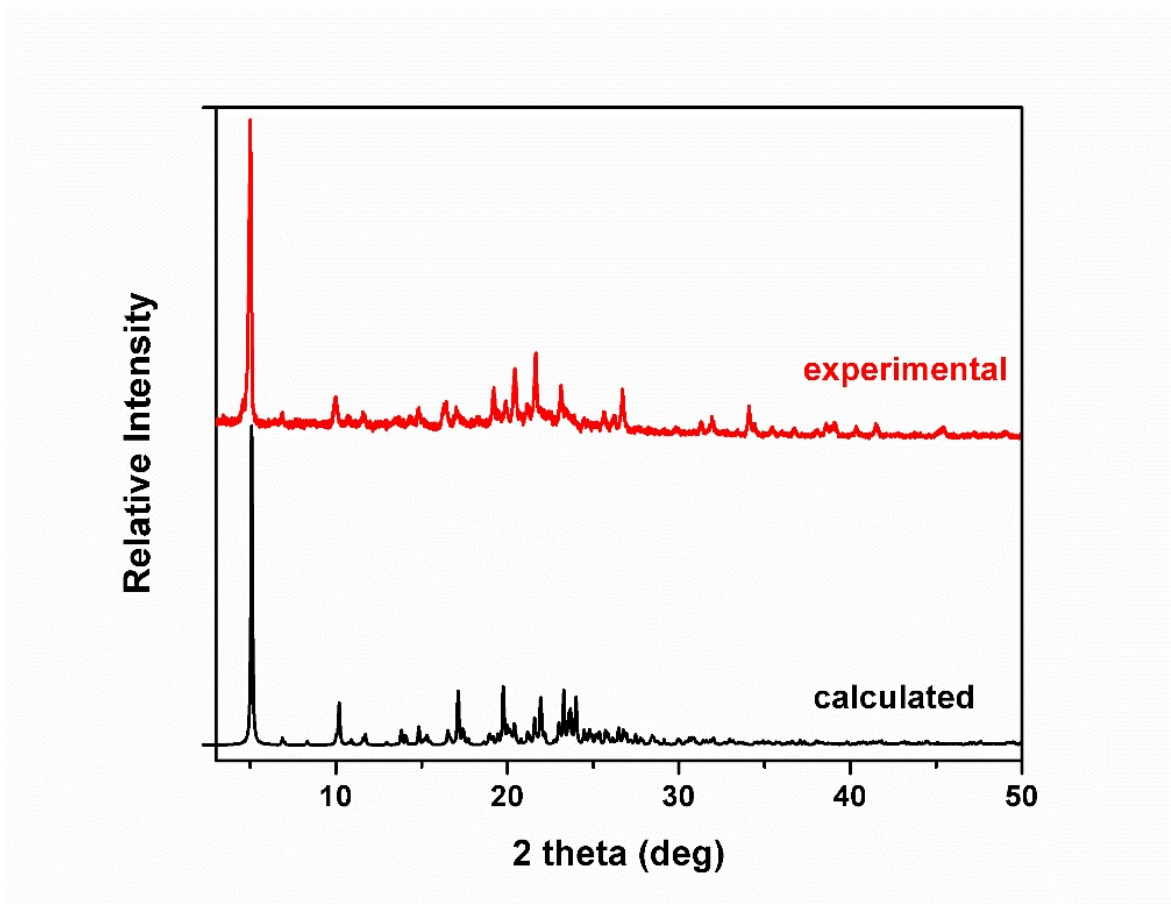

**Figure S6.** A comparison of the calculated (black) and experimental (red) PXRD pattern for the CHX-DS complex.

## 4. Volatile Sulfur Compound (VSC) Reduction

**Table S4.** Samples tested and respective concentrations tested

| Sample Description                     | Concentration (%) |
|----------------------------------------|-------------------|
| Chlorhexidine dodecyl sulfate (CHX-DS) | 0.01              |
| Sodium dodecyl sulfate (SDS)           | 0.01              |
| Chlorhexidine gluconate (CHG)          | 0.01              |
| Methanol                               | 0.01              |

**Table S5.** Grouping information using Tukey method and 95.0% confidence

| <b>C3</b> | <b>N</b> | <b>Mean</b> | <b>Grouping</b> |
|-----------|----------|-------------|-----------------|
| Methanol  | 3        | 11.0822     | A               |
| SDS       | 3        | 10.7974     | A               |
| CHG       | 3        | 10.7800     | A               |
| CHX-DS    | 3        | 10.3956     | B               |

## 5. PXRD data for CHX-DS@SBA-15

**Table S6.** The d-spacing calculated for the corresponding  $2\theta$  peaks.

| <b><math>2\theta</math></b> | <b>d(Å)</b> |
|-----------------------------|-------------|
| 1.14                        | 77.25       |
| 2.22                        | 39.75       |
| 2.92                        | 30.2        |

## 6. Structural Characterization via Scanning Electron Microscopy with Energy Dispersive X-Ray Spectroscopy (SEM-EDX)

The CHX-DS@SBA-15 sample was first coated with Iridium to increase the conductivity during SEM imaging. The SEM images were taken using Zeiss XB540 system, and the EDS spectrum/mapping was obtained by Oxford Xstream EDS system at the accelerating voltage of 10kV and the beam current of 1000 pA.

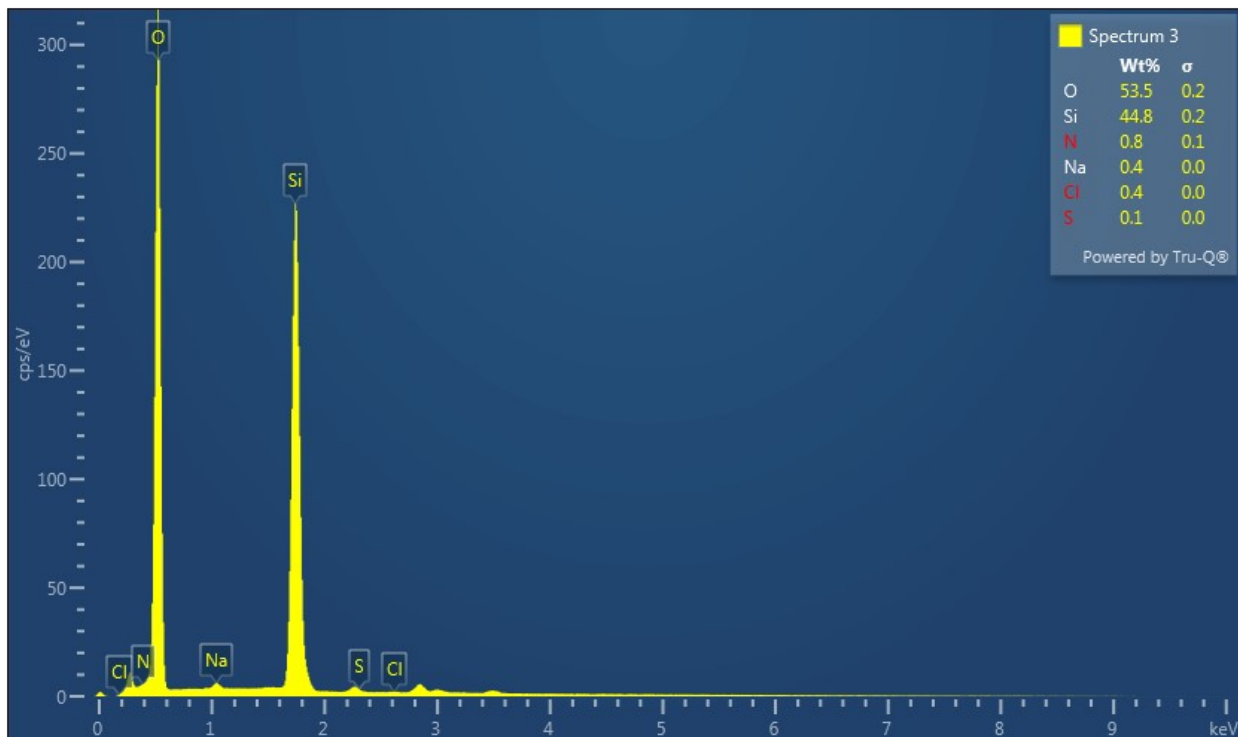

**Figure S7.** SEM-EDX spectrum of CHX-DS@SBA-15

## 7. CHX-DS@SBA-15 Release Studies

The release of CHX-DS from CHX-DS@SBA-15 was investigated under static conditions at room temperature in aqueous media at pH 7.0 and acidified to pH 4.0 with HCl. Specifically, 100 mg of CHX-DS@SBA-15 was added to 50 mL, shaken, and allowed to sit over 48 hours. UV-Vis spectroscopy was used to monitor the release. Prior to UV-Vis measurements, the solutions were centrifuged at 10,000 RPM for 20 minutes, and subsequently filtered and added into the quartz cuvettes for analysis. Although chlorhexidine absorption peaks were observed at 231 and 260 nm, however quantification was not possible due to broad interference peaks, presumably from the silica nanoparticles. Analysis was performed using a Lambda 365 UV/Vis Spectrometer (PerkinElmer, Waltham, MA) with spectra collected from a 190-400 nm wavelength.

Quantification of CHX-DS release was attempted by the construction of calibration curves but proved difficult due to broad interference with silica nanoparticles.
